# Supplementary material for: Methane source attribution in a U.S. dry gas basin using spatial patterns of ground and airborne ethane and methane measurements
Source: Oxford University Press journal article supplement (doi:10.1525/elementa.351), 2019-01-01
Supplement: elementa-7-351-s2.xlsx [file elementa-7-351-s2.xlsx]

## Sheet: mobile lab ERs
type of facility	ER	study area half	mobile laboratory
dehydrator station	4	East	NOAA
gathering station	1.5	West	Aerodyne
gathering station	1.5	West	Aerodyne
gathering station	1.3	West	NOAA
gathering station	1.1	West	Aerodyne
gathering station	1.3	West	Aerodyne
gathering station	1	West	Aerodyne and NOAA
gathering station	1.3	West	Aerodyne
gathering station	1.2	West	Aerodyne
gathering station	1.3	West	Aerodyne
gathering station	1.7	West	Aerodyne
gathering station	1.3	West	Aerodyne
gathering station	1	West	Aerodyne
gathering station	1.2	West	Aerodyne
gathering station	1.5	West	Aerodyne
gathering station	1.6	West	Aerodyne
gathering station	1.4	West	Aerodyne
gathering station	1.4	West	Aerodyne
gathering station	1.5	West	Aerodyne
gathering station	1.4	West	Aerodyne and NOAA
gathering station	1.2	West	NOAA
gathering station	1.3	West	Aerodyne
gathering station	1.5	West	NOAA
gathering station	1.4	West	NOAA
gathering station	1.4	West	Aerodyne
gathering station	1.3	West	Aerodyne
gathering station	1.6	West	Aerodyne
gathering station	1.2	East	NOAA
gathering station	1.6	East	Aerodyne
gathering station	1.5	East	Aerodyne
gathering station	1.3	East	Aerodyne
gathering station	1.4	East	Aerodyne
gathering station	1.1	East	Aerodyne
gathering station	1.1	East	Aerodyne
gathering station	1.4	East	Aerodyne
gathering station	1.7	East	Aerodyne
gathering station	7.9	East	NOAA
pipeline junction	3.9	East	NOAA
production pad	2	West	NOAA
production pad	1.2	West	NOAA
production pad	1.3	West	NOAA
production pad	1.1	West	NOAA
production pad	1	West	Aerodyne and NOAA
production pad	0.8	West	NOAA
production pad	1.3	West	NOAA
production pad	1.1	West	NOAA
production pad	1	West	NOAA
production pad	1	West	Aerodyne
production pad	1	West	NOAA
production pad	1.3	West	NOAA
production pad	1.2	West	NOAA
production pad	1	West	NOAA
production pad	1.3	West	NOAA
production pad	1.1	West	NOAA
production pad	1.1	West	NOAA
production pad	1.3	West	NOAA
production pad	1	West	NOAA
production pad	1.2	West	NOAA
production pad	2.1	West	NOAA
production pad	1.1	West	NOAA
production pad	1.1	West	NOAA
production pad	1.1	West	NOAA
production pad	1.7	West	NOAA
production pad	1.4	West	NOAA
production pad	1.3	West	Aerodyne
production pad	1.9	West	NOAA
production pad	1.5	West	NOAA
production pad	1.2	West	Aerodyne
production pad	1.4	West	NOAA
production pad	1.3	West	NOAA
production pad	1.3	West	NOAA
production pad	1.2	West	NOAA
production pad	1.5	West	NOAA
production pad	1.4	West	Aerodyne
production pad	1.5	West	NOAA
production pad	1.5	West	NOAA
production pad	1.4	West	NOAA
production pad	1.5	West	NOAA
production pad	1.3	West	NOAA
production pad	1.2	West	NOAA
production pad	1.3	West	NOAA
production pad	1.6	West	NOAA
production pad	1	West	NOAA
production pad	1.5	West	NOAA
production pad	1.3	West	NOAA
production pad	1.3	West	NOAA
production pad	1.3	West	NOAA
production pad	1.4	West	NOAA
production pad	1.6	West	Aerodyne
production pad	1.5	West	NOAA
production pad	1.7	East	NOAA
production pad	1	East	NOAA
production pad	1.2	East	NOAA
production pad	1.3	East	NOAA
production pad	1.2	East	NOAA
production pad	1.5	East	NOAA
production pad	1.7	East	Aerodyne
production pad	1.5	East	Aerodyne
production pad	1.3	East	Aerodyne
production pad	1.3	East	NOAA
production pad	1.5	East	NOAA
production pad	1.1	East	Aerodyne
production pad	2.1	East	Aerodyne
production pad	1.6	East	Aerodyne
production pad	3.7	East	NOAA
production pad	4.1	East	NOAA
production pad	6.6	East	NOAA
production pad	7	East	NOAA
production pad	7.8	East	NOAA
production pad	6.2	East	NOAA
transmission station	2	West	Aerodyne
transmission station	4	East	Aerodyne
transmission station	5.7	East	Aerodyne
transmission station	1.6	East	Aerodyne
